# Supplementary material for: Total flavonoids suppress lung cancer growth via the COX-2-mediated Wnt/β-catenin signaling pathway
Source: PubMed Central journal article supplement — Oncol Lett. 2020 Jan 9;19(3):1824–30. doi: 10.3892/ol.2020.11271 (PMC7039044; doi:10.3892/ol.2020.11271), 2020-01-09

Figure S1. Relative COX-2 mRNA expression in A549 cells following transfection with pCOX-2. \*\*P<0.01 vs. control. COX-2, cyclooxygenase 2.

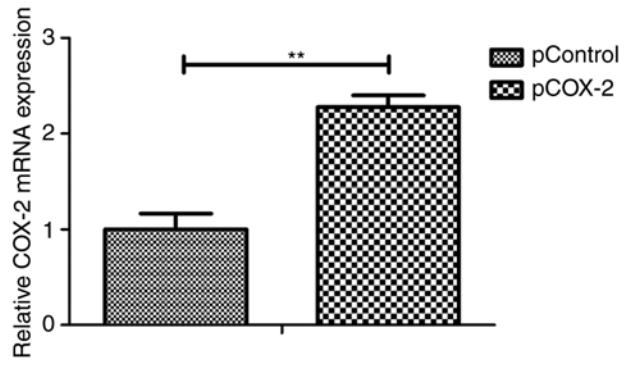

Supplement: Supplementary_Data.pdf [file Supplementary_Data.pdf]
